# Supplementary material for: Detection of NaCN in aqueous media using a calixarene-based fluoroionophore containing ruthenium(ii)-bipyridine as the fluorogenic unit
Source: Royal Society of Chemistry journal article supplement (doi:10.1039/c4ra12075b), 2014-12-02
Supplement: c4ra12075b1.pdf [file c4ra12075b1.pdf]

## Electronic Supplementary Information (ESI)

### Detection of NaCN in aqueous media using calixarene-based fluoroionophore containing ruthenium(II)-bipyridine as fluorogenic unit†

Debdeep Maity‡, Gaurav Vyas, Madhuri Bhatt† and Parimal Paul\*†‡

Analytical Discipline and Centralized Instrument Facility, CSIR-Central Salt and Marine Chemicals Research Institute, G. B. Marg, Bhavnagar 364002, India.

†Academy of Scientific and Innovative Research (AcSIR), CSIR-CSMCRI, G. B. Marg, Bhavnagar 364002, India: E-mail: [ppaul@csmcri.org](mailto:ppaul@csmcri.org)

| Figures                                                                                                                                                                                                                                                                                                                                           | Page number |
|---------------------------------------------------------------------------------------------------------------------------------------------------------------------------------------------------------------------------------------------------------------------------------------------------------------------------------------------------|-------------|
| <b>Fig. S1:</b> ES-MS (m/z) of the compound L recorded in CH <sub>3</sub> CN                                                                                                                                                                                                                                                                      | 2           |
| <b>Fig.S2.</b> ES-MS (m/z) of the complex 1 recorded in CH <sub>3</sub> CN.                                                                                                                                                                                                                                                                       | 3           |
| <b>Fig.S3.</b> <sup>1</sup> H NMR spectrum of the compound L recorded in CDCl <sub>3</sub> .                                                                                                                                                                                                                                                      | 4           |
| <b>Fig.S4.</b> <sup>1</sup> H NMR spectrum of the complex1 recorded in CD <sub>3</sub> CN.                                                                                                                                                                                                                                                        | 5           |
| <b>Fig. S5.</b> Emission spectral change of 1 with all sodium salts                                                                                                                                                                                                                                                                               | 6           |
| <b>Fig.S6.</b> reversible study of complex 1 with addition of NaCN and Cu(ClO <sub>4</sub> ) <sub>2</sub>                                                                                                                                                                                                                                         | 7           |
| <b>Fig. S7.</b> Emission spectral change for 1 (1x10 <sup>-6</sup> M) upon addition of 1,butyl-3-methylimidazolium acetate (BMI <sup>+</sup> Ac <sup>-</sup> , 1 x10 <sup>-4</sup> M)                                                                                                                                                             | 8           |
| <b>Fig. S7</b> Emission spectral changes for 1 (1.5 x 10 <sup>-6</sup> M) upon addition of increasing amount of TBACN <sup>-</sup> in H <sub>2</sub> O-CH <sub>3</sub> CN (95:5). Excitation wavelength: 458 nm. Inset: linear regression fit (double-logarithmic plot) of the titration data as a function of concentration of CN <sup>-</sup> . | 9           |
| <b>Fig. S8</b> Cyclic voltammogram (black line) and differential pulse voltammogram (DPV, blue line) of the complex 1                                                                                                                                                                                                                             | 10          |
| <b>Fig. S9</b> Relevant portion of the mass spectra for 1 in presence of AcO <sup>-</sup> (10 equivalents) recorded in CH <sub>3</sub> CN                                                                                                                                                                                                         | 11          |

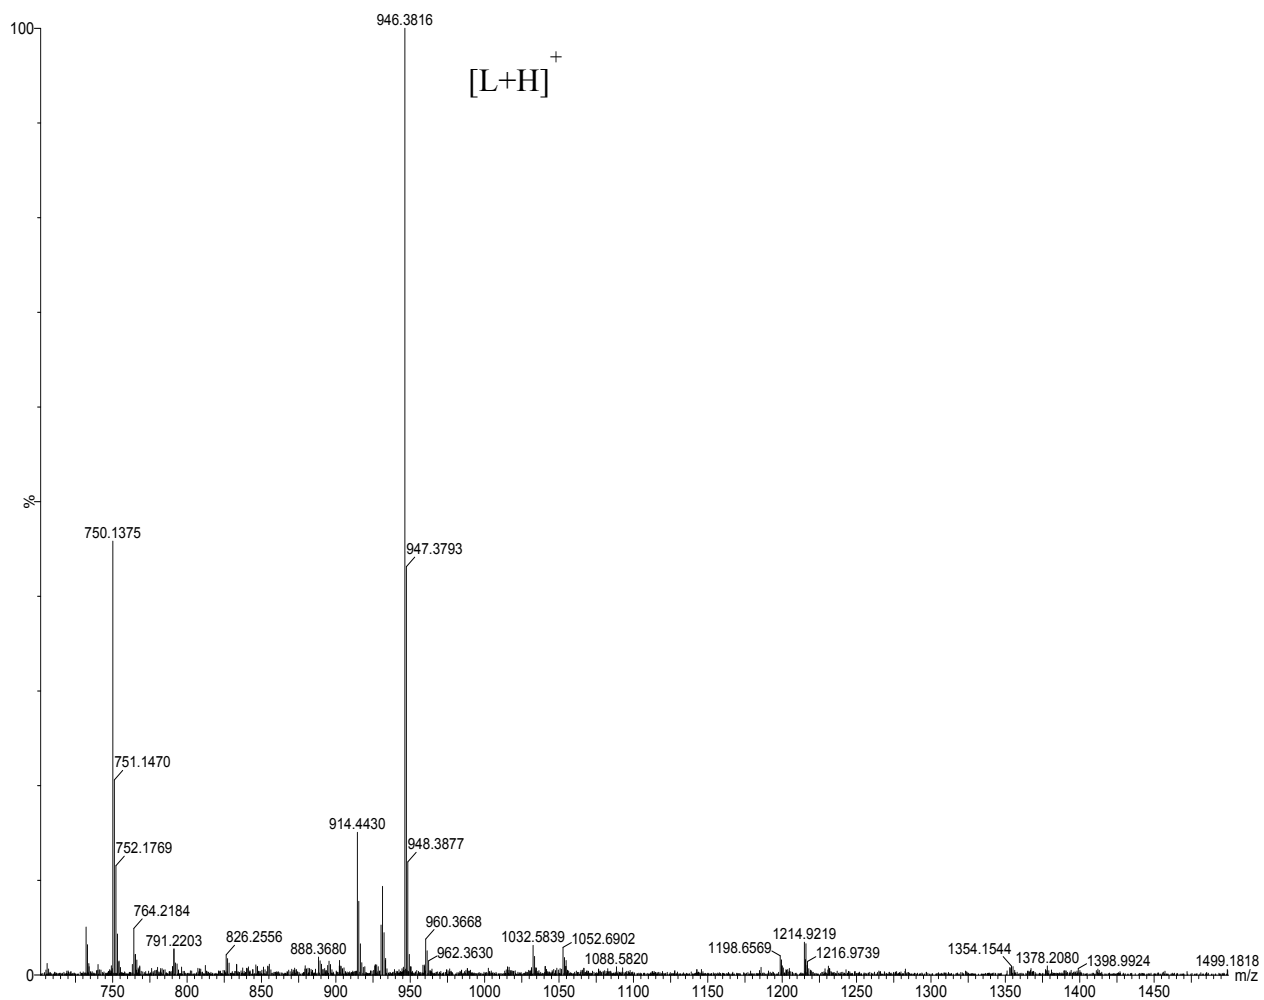

**Fig.S1.** ES-MS (m/z) of the compound L recorded in CH<sub>3</sub>CN.

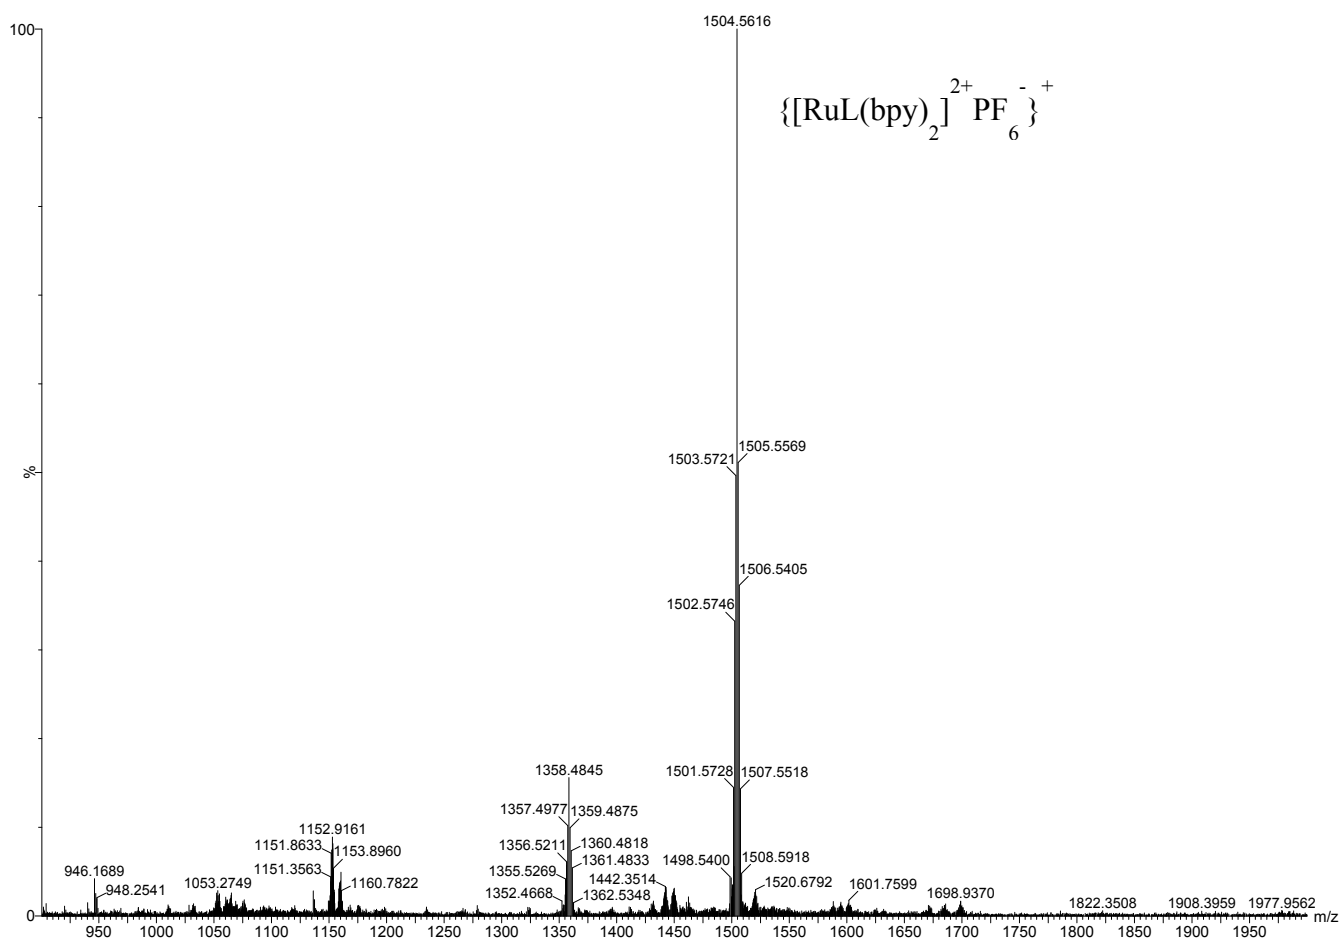

**Fig.S2.** ES-MS (m/z) of the complex 1 recorded in CH<sub>3</sub>CN.

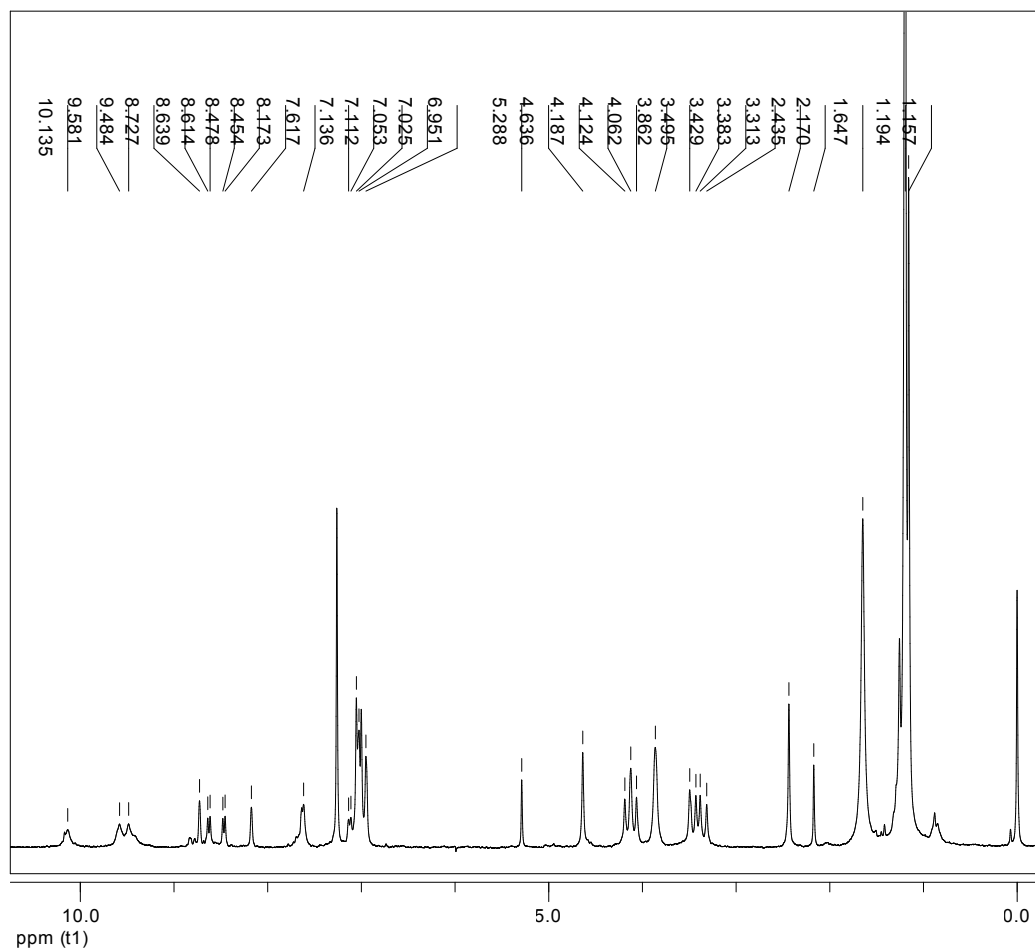

**Fig.S3.** <sup>1</sup>H NMR spectrum of the compound L recorded in CDCl<sub>3</sub>.

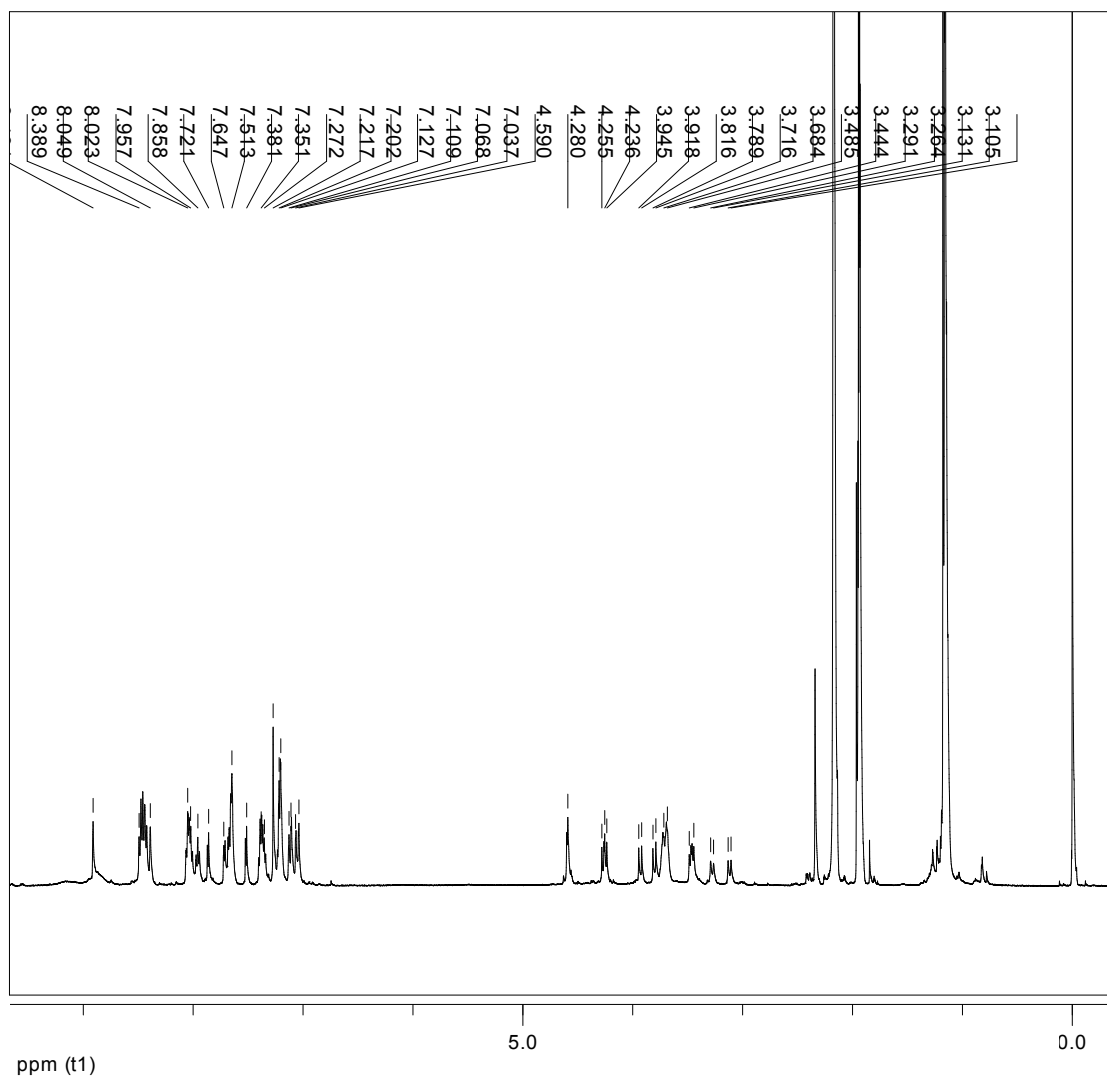

**Fig.S4.**  $^1\text{H}$  NMR spectrum of the complex1 recorded in  $\text{CD}_3\text{CN}$ .

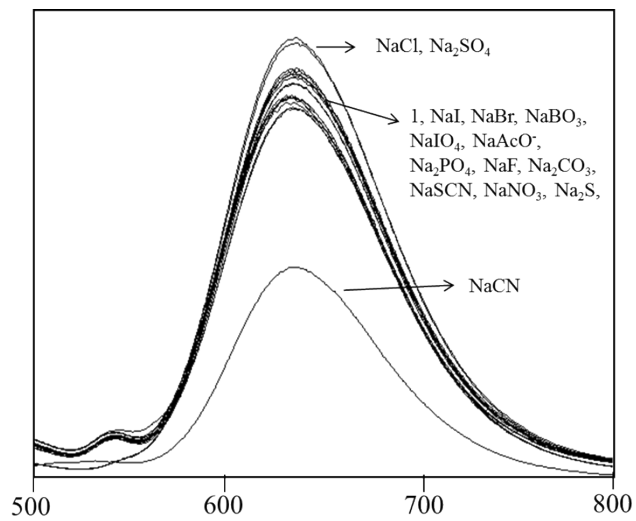

**Fig. S5.** Emission spectral change of 1 with all sodium salts

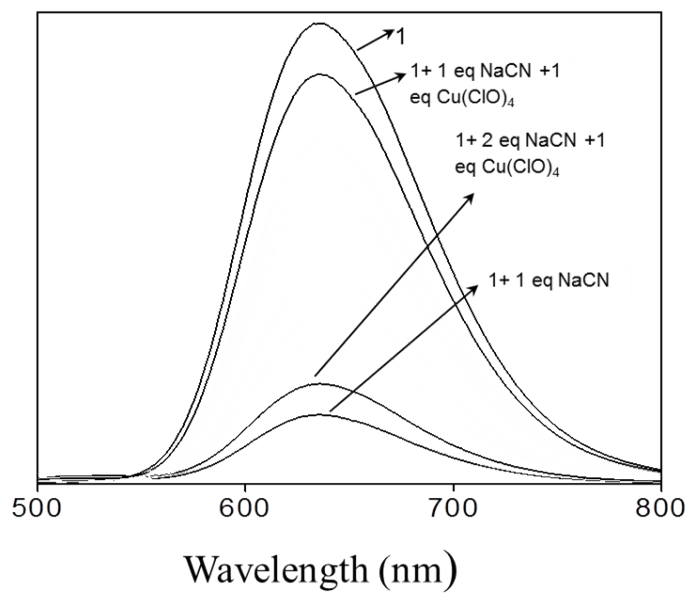

**Fig.S6.** reversible study of complex 1 with addition of NaCN and Cu(ClO<sub>4</sub>)<sub>2</sub>

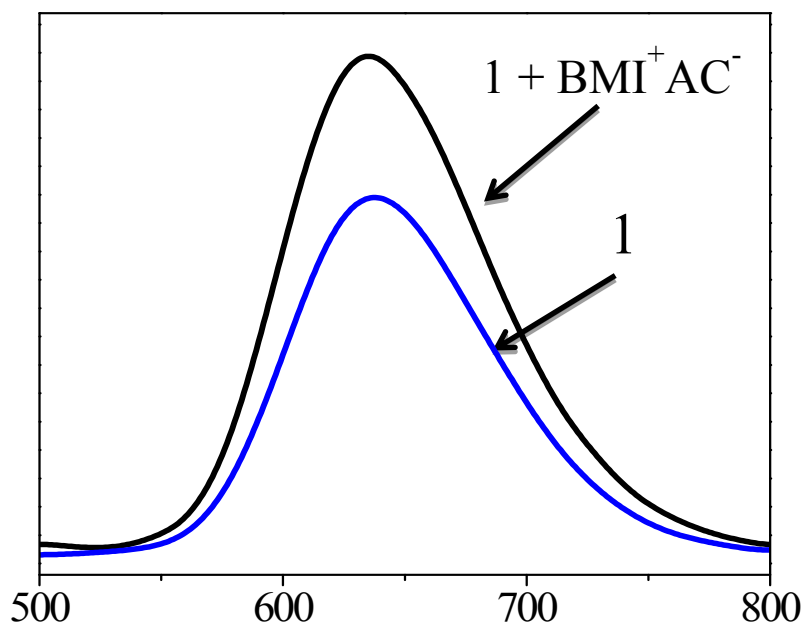

**Fig. S7.** Emission spectral change for **1** ( $1 \times 10^{-6}$  M) upon addition of 1-butyl-3-methylimidazolium acetate ( $\text{BMI}^+\text{Ac}^-$ ,  $1 \times 10^{-4}$  M).



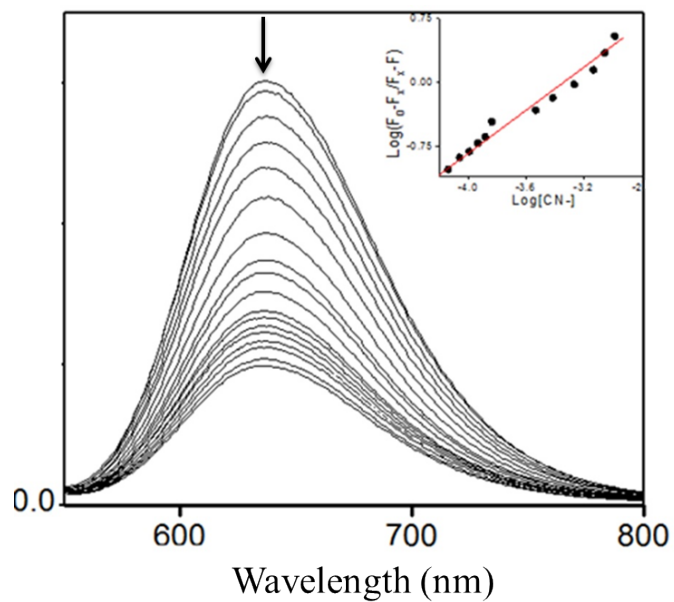

**Fig. S8** Emission spectral changes for 1 ( $1.5 \times 10^{-6}$  M) upon addition of increasing amount of TBACN<sup>-</sup> in H<sub>2</sub>O-CH<sub>3</sub>CN (95:5). Excitation wavelength: 458 nm. Inset: linear regression fit (double-logarithmic plot) of the titration data as a function of concentration of CN<sup>-</sup>.

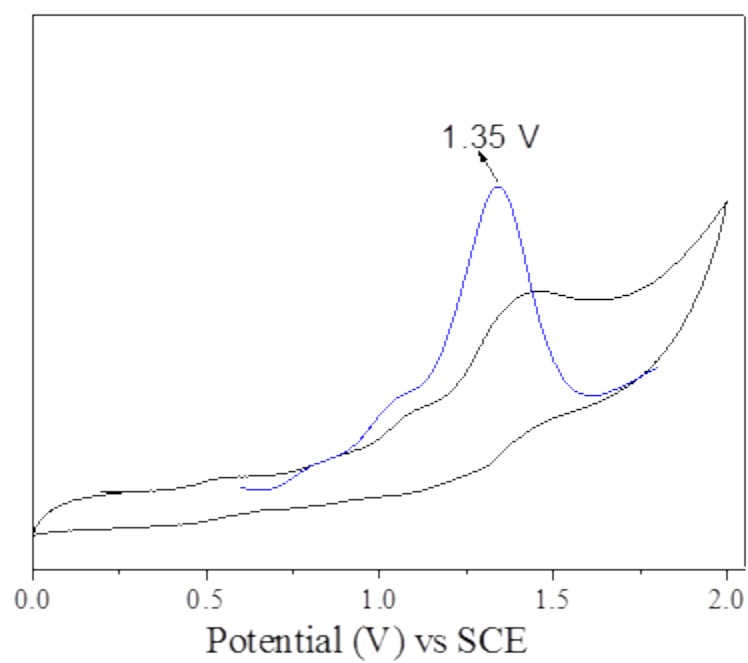

**Fig. S9** Cyclic voltammogram (black line) and differential pulse voltammogram (DPV, blue line) of the complex **1**

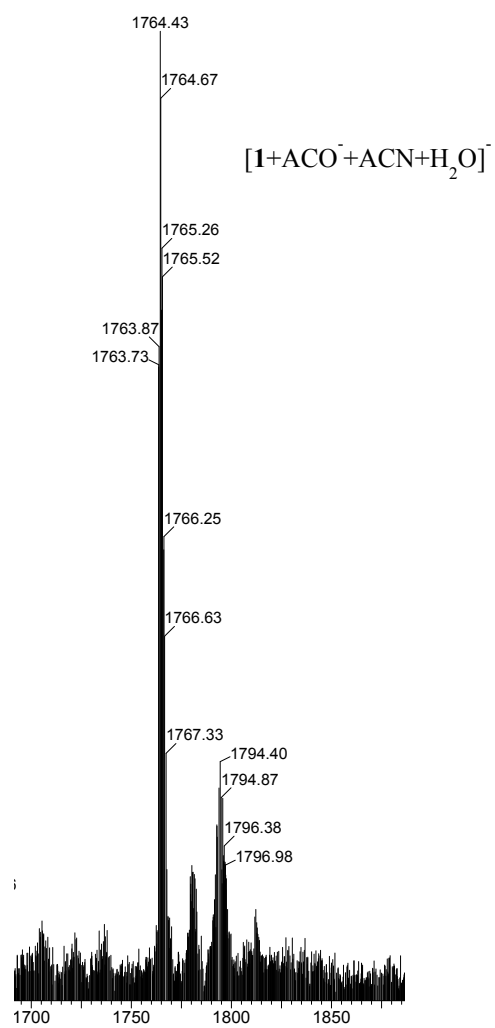

**Fig. S10** Relevant portion of the mass spectra for 1 in presence of  $AcO^-$  (10 equivalents) recorded in  $CH_3CN$
